# Supplementary material for: Birth Outcomes after the Fukushima Daiichi Nuclear Power Plant Disaster: A Long-Term Retrospective Study
Source: MDPI journal article supplement (doi:10.3390/ijerph14050542), 2017-05-19
Supplement: s1 [file s1]

Supplementary Table 1: Post-disaster food purchasing patterns (n, %)

|           | Year | Category*  |           |           |         | P-value† |
|-----------|------|------------|-----------|-----------|---------|----------|
|           |      | (a)        | (b)       | (c)       | (d)     |          |
| Rice      | 2012 | 46 (59.7)  | 8 (10.4)  | 18 (23.4) | 5 (6.5) | <0.05    |
|           | 2013 | 79 (56.4)  | 27 (19.3) | 33 (23.6) | 1 (0.7) |          |
|           | 2014 | 99 (60.7)  | 27 (16.6) | 37 (22.7) | 0 (0.0) |          |
| Meat      | 2012 | 61 (70.1)  | 26 (29.9) | 0 (0.0)   | 0 (0.0) | 0.45     |
|           | 2013 | 87 (62.1)  | 53 (37.9) | 0 (0.0)   | 0 (0.0) |          |
|           | 2014 | 104 (63.8) | 59 (36.2) | 0 (0.0)   | 0 (0.0) |          |
| Fish      | 2012 | 65 (74.7)  | 22 (25.3) | 0 (0.0)   | 0 (0.0) | 0.77     |
|           | 2013 | 100 (71.9) | 39 (28.1) | 0 (0.0)   | 0 (0.0) |          |
|           | 2014 | 120 (73.6) | 41 (25.2) | 2 (1.2)   | 0 (0.0) |          |
| Produce   | 2012 | 43 (57.3)  | 18 (24.0) | 7 (9.3)   | 7 (9.3) | <0.01    |
|           | 2013 | 91 (66.4)  | 36 (26.3) | 7 (5.1)   | 3 (2.2) |          |
|           | 2014 | 105 (71.9) | 35 (24.0) | 6 (4.1)   | 0 (0.0) |          |
| Mushrooms | 2012 | 60 (69.0)  | 27 (31.0) | 0 (0.0)   | 0 (0.0) | 0.82     |
|           | 2013 | 96 (68.6)  | 44 (31.4) | 0 (0.0)   | 0 (0.0) |          |
|           | 2014 | 117 (71.8) | 46 (28.2) | 0 (0.0)   | 0 (0.0) |          |
| Milk      | 2012 | 55 (64.7)  | 28 (32.9) | 1 (1.2)   | 1 (1.2) | 0.22     |
|           | 2013 | 74 (52.9)  | 64 (45.7) | 2 (1.4)   | 0 (0.0) |          |
|           | 2014 | 98 (60.1)  | 64 (39.3) | 1 (0.6)   | 0 (0.0) |          |

\* (a) Selecting food products at a supermarket based on origin (Fukushima vs. non-Fukushima)

(b) Selecting food products at a supermarket without considering origin

(c) Using local farms or homegrown foods with radiation inspection

(d) Using local farms or homegrown foods without radiation inspection

†Fisher's exact test for comparing percentages
