# Supplementary material for: Birth Outcomes after the Fukushima Daiichi Nuclear Power Plant Disaster: A Long-Term Retrospective Study
Source: MDPI journal article supplement (doi:10.3390/ijerph14050542), 2017-05-19
Supplement: s1 [file s1]

Supplementary Table 2: Regression model for post-disaster preterm birth (95% CI)

| Variable                                                 | Odds ratio | 95% CI     | P-value |
|----------------------------------------------------------|------------|------------|---------|
| Year                                                     |            |            |         |
| 2012                                                     | Ref.       |            |         |
| 2013                                                     | 2.20       | 0.45–10.77 | 0.33    |
| 2014                                                     | 1.04       | 0.19–5.70  | 0.96    |
| Sex of neonate                                           |            |            |         |
| Male                                                     | Ref.       |            |         |
| Female                                                   | 0.56       | 0.19–1.59  | 0.27    |
| Maternal age [year]                                      |            |            |         |
| –35]                                                     | Ref.       |            |         |
| (35–                                                     | 1.02       | 0.30–3.39  | 0.98    |
| Number of previous deliveries                            |            |            |         |
| 0                                                        | Ref.       |            |         |
| 1                                                        | 0.41       | 0.11–1.56  | 0.19    |
| More than 2                                              | 1.08       | 0.31–3.81  | 0.91    |
| Residential area                                         |            |            |         |
| Inside the mandatory evacuation zone                     | 1.24       | 0.07–20.93 | 0.88    |
| Inside the sheltering/voluntary evacuation zone          | 2.38       | 0.28–20.37 | 0.43    |
| Inside areas of Soso District under no evacuation orders | 2.61       | 0.29–23.16 | 0.39    |
| Outside Soso District                                    | Ref.       |            |         |
