# Supplementary material for: Birth Outcomes after the Fukushima Daiichi Nuclear Power Plant Disaster: A Long-Term Retrospective Study
Source: MDPI journal article supplement (doi:10.3390/ijerph14050542), 2017-05-19
Supplement: s1 [file s1]

Supplementary Table 3: Number (percentage) of low birthweight and preterm births by food purchasing patterns\*

|                      | Rice       |          | Meat       |          | Fish       |           | Produce    |          | Mushrooms  |          | Milk       |           |
|----------------------|------------|----------|------------|----------|------------|-----------|------------|----------|------------|----------|------------|-----------|
| Birthweight          | (2500-     | -2500]   | (2500-     | -2500]   | (2500-     | -2500]    | (2500-     | -2500]   | (2500-     | -2500]   | (2500-     | -2500]    |
| (1)                  | 205 (91.5) | 19 (8.5) | 236 (93.7) | 16 (6.4) | 267 (93.7) | 18 (6.3)  | 223 (93.3) | 16 (6.7) | 254 (93.0) | 19 (7.0) | 211 (93.0) | 16 (7.1)  |
| (2)                  | 58 (93.6)  | 4 (6.5)  | 125 (90.6) | 13 (9.4) | 91 (89.2)  | 11 (10.8) | 81 (91.0)  | 8 (9.0)  | 107 (91.5) | 10 (8.6) | 144 (92.3) | 12 (7.7)  |
| (3)                  | 83 (94.3)  | 5 (5.7)  | 0 (0.0)    | 0 (0.0)  | 2 (100.0)  | 0 (0.0)   | 18 (90.0)  | 2 (10.0) | 0 (0.0)    | 0 (0.0)  | 4 (100.0)  | 0 (0.0)   |
| (4)                  | 5 (83.3)   | 1 (16.7) | 0 (0.0)    | 0 (0.0)  | 0 (0.0)    | 0 (0.0)   | 10 (100.0) | 0 (0.0)  | 0 (0.0)    | 0 (0.0)  | 0 (0.0)    | 1 (100.0) |
| P-value <sup>†</sup> | 0.56       |          | 0.31       |          | 0.30       |           | 0.72       |          | 0.67       |          | 0.14       |           |
| Gestational term     | Full term  | Preterm  | Full term  | Preterm  | Full term  | Preterm   | Full term  | Preterm  | Full term  | Preterm  | Full term  | Preterm   |
| (1)                  | 217 (96.9) | 7 (3.1)  | 245 (97.2) | 7 (2.8)  | 278 (97.5) | 7 (2.5)   | 231 (96.7) | 8 (3.4)  | 266 (97.4) | 7 (2.6)  | 220 (96.9) | 7 (3.1)   |
| (2)                  | 61 (98.4)  | 1 (1.6)  | 133 (96.4) | 5 (3.6)  | 97 (95.1)  | 5 (4.9)   | 86 (96.6)  | 3 (3.4)  | 112 (95.7) | 5 (4.3)  | 151 (96.8) | 5 (3.2)   |
| (3)                  | 84 (95.5)  | 4 (4.6)  | 0 (0.0)    | 0 (0.0)  | 2 (100.0)  | 0 (0.0)   | 20 (100.0) | 0 (0.0)  | 0 (0.0)    | 0 (0.0)  | 4 (100.0)  | 0 (0.0)   |
| (4)                  | 6 (100.0)  | 0 (0.0)  | 0 (0.0)    | 0 (0.0)  | 0 (0.0)    | 0 (0.0)   | 10 (100.0) | 0 (0.0)  | 0 (0.0)    | 0 (0.0)  | 1 (100.0)  | 0 (0.0)   |
| P-value <sup>†</sup> | 0.72       |          | 0.76       |          | 0.36       |           | 1.00       |          | 0.36       |          | 1.00       |           |

\* (1) Selecting food products at a supermarket based on origin (Fukushima vs. non-Fukushima)

(2) Selecting food products at a supermarket without considering origin

(3) Using local farms or homegrown foods with radiation inspection

(4) Using local farms or homegrown foods without radiation inspection

<sup>†</sup> Fisher's exact test for comparing percentages
